# Supplementary material
Source: MDPI journal article supplement (https://www.mdpi.com/2073-4344/13/6/995)
Supplement: s1 [file s1]

# Noble metal modified TiO<sub>2</sub> hierarchically structured microspheres with enhanced photocatalytic activity

Haisheng Huang<sup>1,2</sup>, Juan Wang<sup>1,2,3</sup>, Qi Kong<sup>1,2</sup>, Yao Xu<sup>1,2</sup>, Zhishun Wei<sup>1,2,3,\*</sup> and Ying Chang<sup>1,2,3,\*</sup>

<sup>1</sup> Hubei Provincial Key Laboratory of Green Materials for Light Industry, New Materials and Green Manufacturing Talent Introduction and Innovation Demonstration Base, Hubei University of Technology, Wuhan 430068, China

<sup>2</sup> School of Materials and Chemical Engineering, Hubei University of Technology, Wuhan 430068, China

<sup>3</sup> Hubei Longzhong Laboratory, Xiangyang, Hubei 441000, China

\* Correspondence: wei.zhishun@hbut.edu.cn (Z.W.); cy0025@hbut.edu.cn (Y.C.)

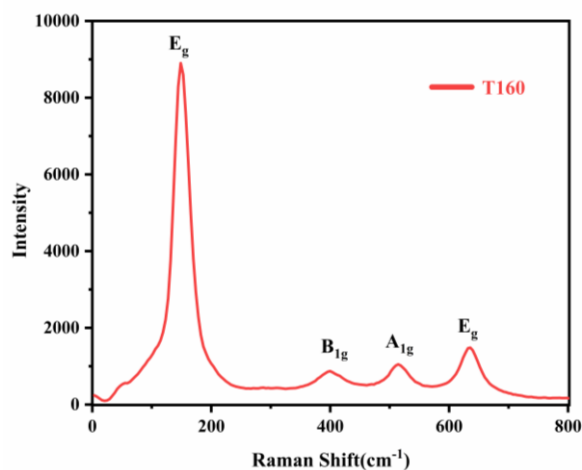

Figure S1. Raman spectroscopy of T160.

**Table S1.** Crystallite sizes of samples calculated from XRD by Debye-Scherrer Formula.

|                        | T100  | T120  | T140  | T160  | T180  | T200  |
|------------------------|-------|-------|-------|-------|-------|-------|
| Crystallite sizes (nm) | 20.39 | 27.09 | 27.09 | 27.09 | 27.09 | 27.10 |

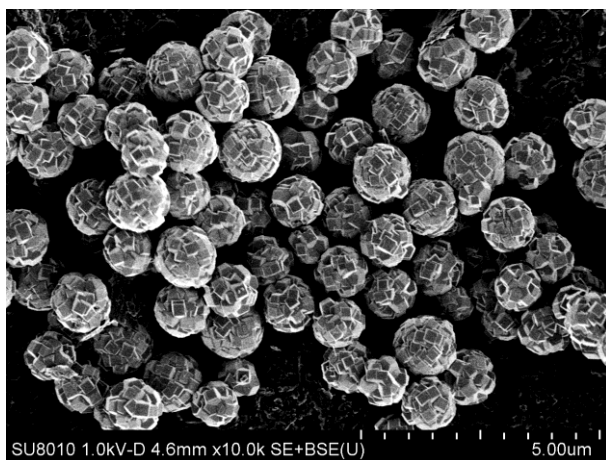

Figure S2. Low magnification SEM image of T160.

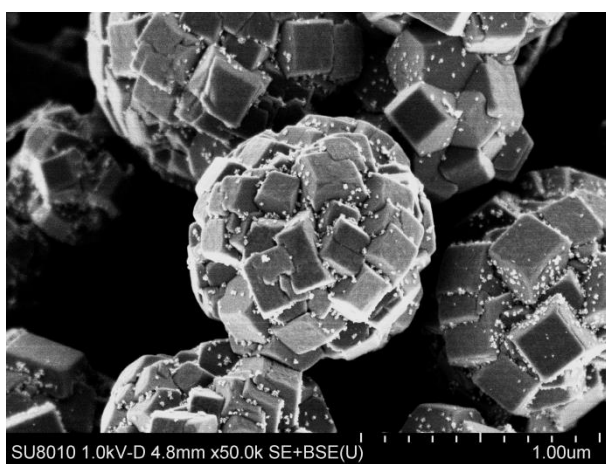

Figure S3. SEM image of TPt.

**Table S2.** The content of vacancy oxygen ( $O_v$ ).

|             | T160 | TCu  | TPd  | TAg  | TPt  | TAu  |
|-------------|------|------|------|------|------|------|
| $O_v/O(\%)$ | 21.5 | 27.3 | 27.2 | 28.6 | 27.3 | 24.5 |

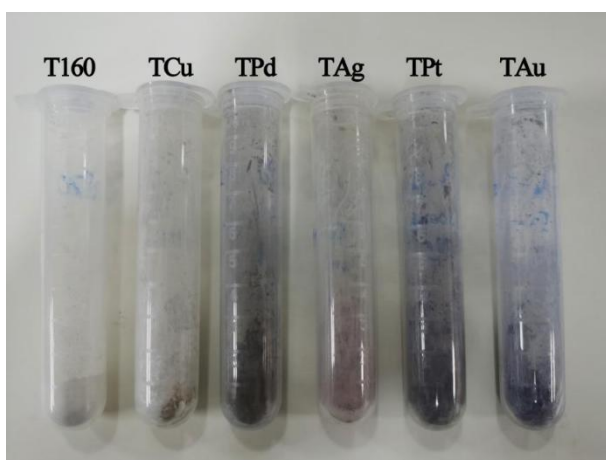

Figure S4. Macroscopic color of the samples.

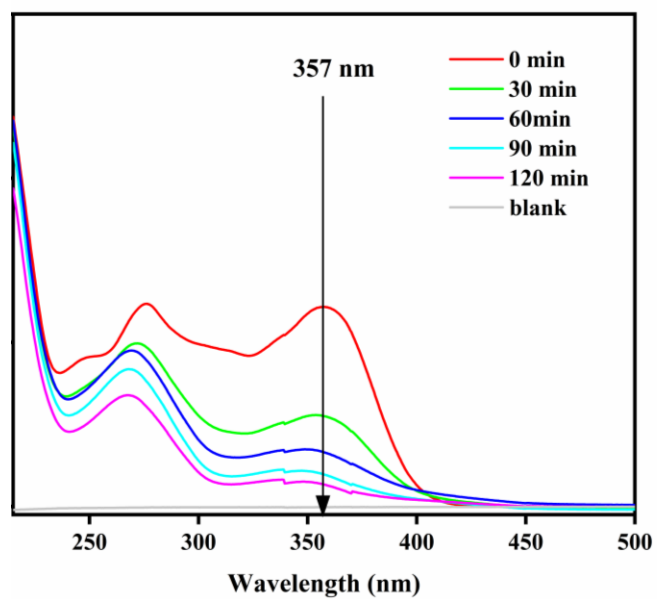

Figure S5. The change of absorption spectrum during the TC degradation (TPt).

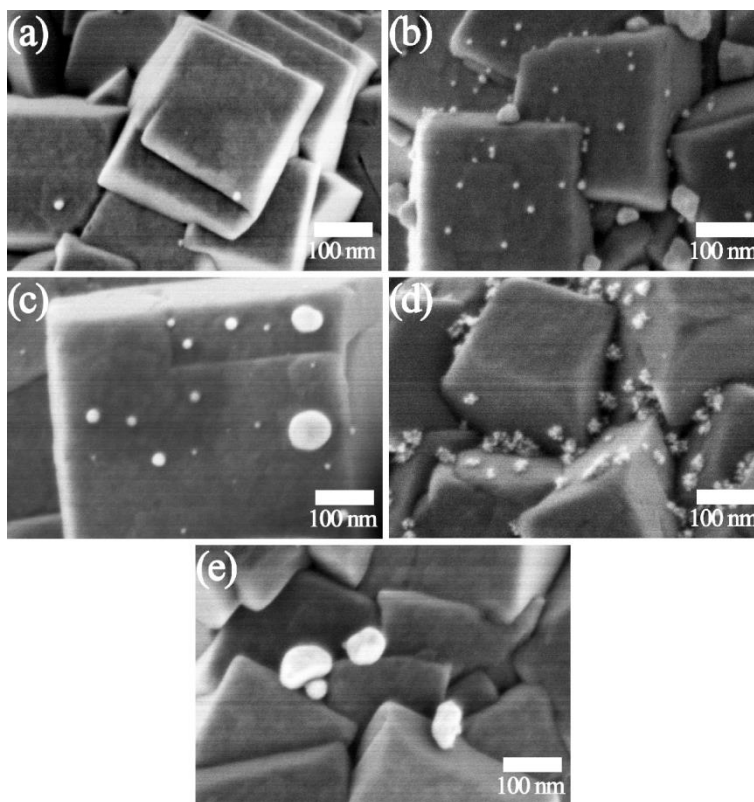

Figure S6. SEM image of deposited samples, (a) TCu, (b) TPd, (c) TAg, (d) TPt, (e) TAg.

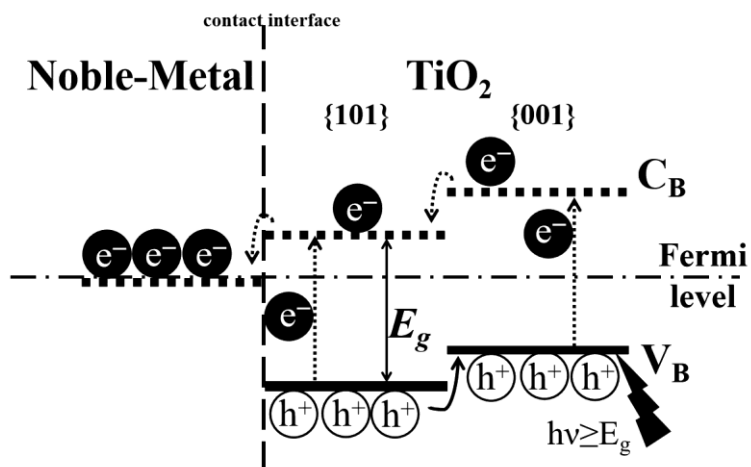

Figure S7. Schematic diagram of photogenerated electron transfer and electron trap of noble-metal.

**Table S3.** The Photocatalytic activity of the samples and P25 .

|                                          | P25                   | T160                  | TCu                   | TPd                   | TAg                   | TPt                   | TAu                   |
|------------------------------------------|-----------------------|-----------------------|-----------------------|-----------------------|-----------------------|-----------------------|-----------------------|
| Degradation activity (k/m <sup>2</sup> ) | 1.17·10 <sup>-3</sup> | 1.85·10 <sup>-3</sup> | 3.75·10 <sup>-3</sup> | 2.73·10 <sup>-3</sup> | 2.07·10 <sup>-3</sup> | 4.57·10 <sup>-3</sup> | 2.33·10 <sup>-3</sup> |
